# Supplementary material for: Porous silicon nanoparticles as a nanophotocathode for photoelectrochemical water splitting
Source: Royal Society of Chemistry journal article supplement (doi:10.1039/c5ra12559f), 2015-01-01
Supplement: c5ra12559f1.pdf [file c5ra12559f1.pdf]

**Porous silicon nanoparticles as a nanophotocathode for  
photoelectrochemical water splitting**

Soundarrajan Chandrasekaran,<sup>a</sup> Steven J. P. McInnes,<sup>a</sup> Thomas J. Macdonald,<sup>b</sup> Thomas  
Nann<sup>\*b</sup> and Nicolas H. Voelcker<sup>\*a</sup>

<sup>a</sup> Mawson Institute, University of South Australia, Adelaide, South Australia 5001, Australia.

<sup>b</sup> Ian Wark Research Institute, University of South Australia, Mawson Lakes Blvd, Adelaide,  
SA 5095, Australia.

<sup>\*</sup>Email: Nico.Voelcker@unisa.edu.au, Thomas.Nann@unisa.edu.au

## Supporting Information

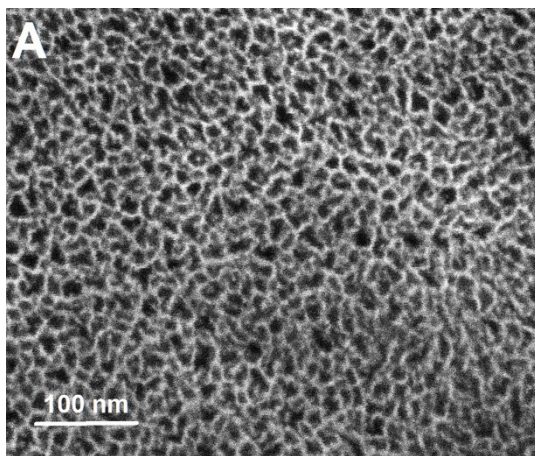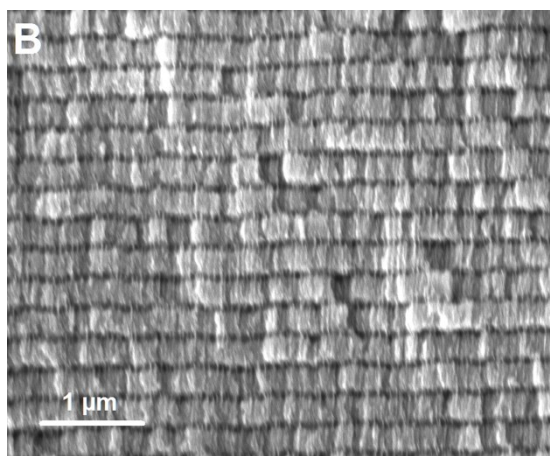

**Figure S1.** (A) SEM image (Top view) and (B) cross-sectional SEM image showing low and high porosity layers of pSi membrane.

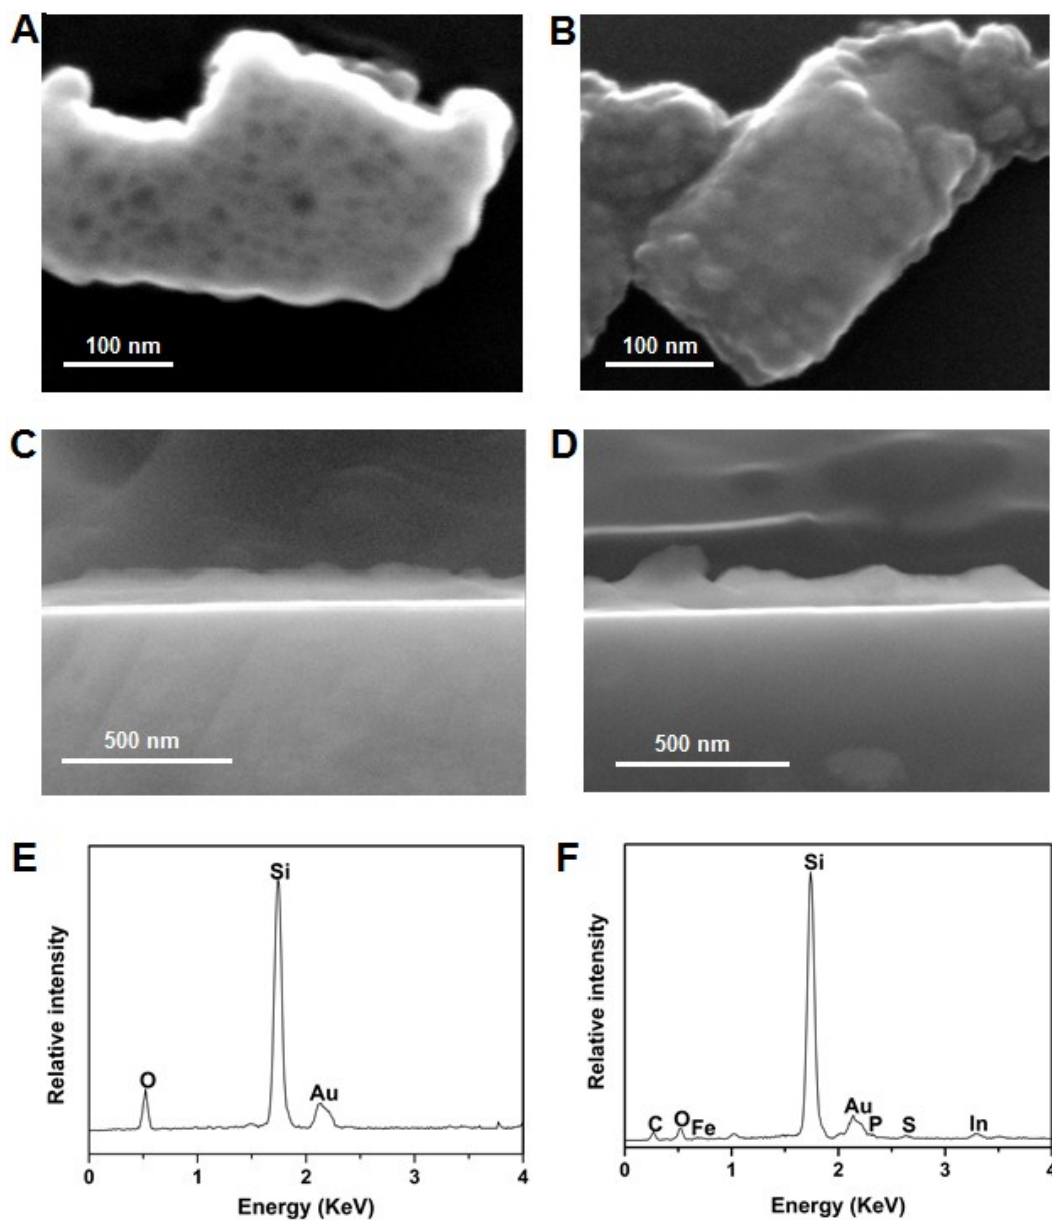

**Figure S2.** (A) and (B) show SEM images (top view) of AM hydrosilylated pSi NPs and AM hydrosilylated pSi NPs + InP NCs +  $\text{Fe}_2\text{S}_2(\text{CO})_6$  catalyst on gold, respectively. (C) and (D) show the cross-sectional SEM images corresponding to (A) and (B), respectively. (E) and (F) show the EDX spectra corresponding to (A) and (B), respectively.

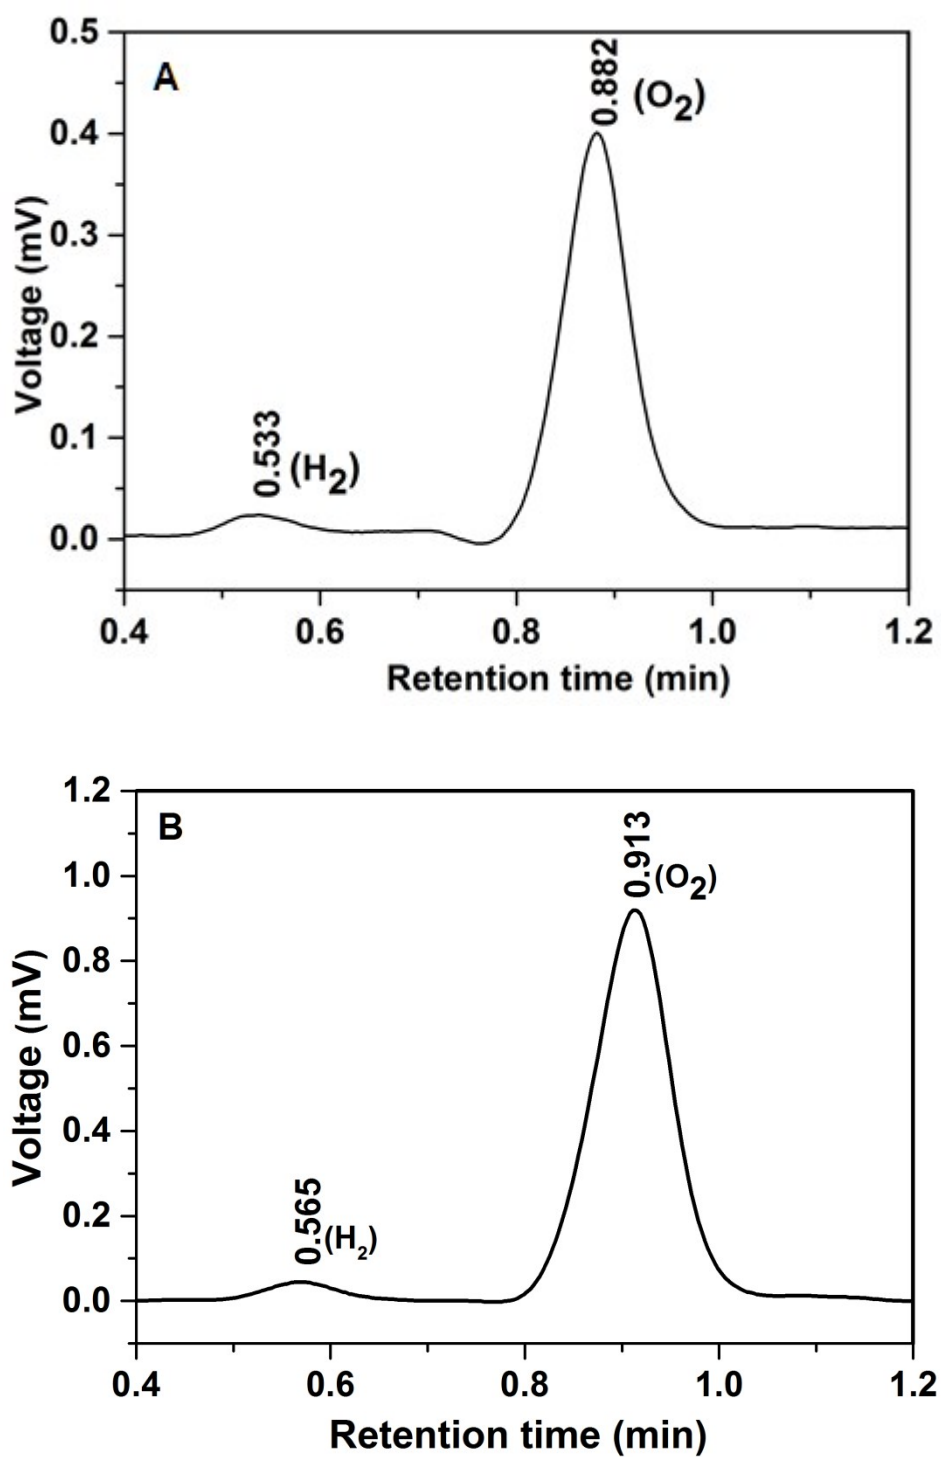

**Figure S3.** (A) GC analysis of the sample gas from the headspace above the hybrid PEC electrode (310  $\mu$ l) and (B) 200 ppm standard H<sub>2</sub> (310  $\mu$ l).

### Theoretical moles of H<sub>2</sub> produced

According to  $R(H_2) = \frac{I}{nF}$ , a photocurrent of 2.2  $\mu A$  should produce 41 nmol of H<sub>2</sub> for 1 h.

$$R(H_2) = \frac{2.2 \times 10^{-6} A}{2 \frac{\text{mol } e^-}{\text{mol } H_2} \times 96485 \frac{C}{\text{mol } e^-}} = 1.14 \times 10^{-5} \times 10^{-6} A \text{ mol } H_2 C^{-1}$$

For 1 h of water splitting reaction =  $1.14 \times 10^{-5} \times 10^{-6} A \text{ mol } H_2 C^{-1} \times 3600 s$

(where Charge (C) = Current (A) x Time (s))

**Amount of H<sub>2</sub> evolution for 1 h = 41 nmol.**

### Calculation for moles of H<sub>2</sub> produced from gas chromatography

Area of pure H<sub>2</sub> (310  $\mu l$ , 200 ppm) = 0.00452 mV min

Consider, 99.5% of pure H<sub>2</sub> has 995000 ppm of H<sub>2</sub>.

To convert the area of pure H<sub>2</sub> (310  $\mu l$ , 200 ppm)

$$\text{into high pure } H_2 = \left[ \frac{0.00452 \text{ mV min}}{200 \text{ ppm}} \right] \times 995000 \text{ ppm} = 22.487 \text{ mV min.}$$

Area of high pure H<sub>2</sub> (310  $\mu l$ ) = 22.487 mV min.

Area of sample H<sub>2</sub> (310  $\mu l$ ) after 1 h = 0.00294 mV min

From the areas of pure and sample H<sub>2</sub>, the H<sub>2</sub> evolution is calculated based on the formula from Zhang *et al.*<sup>1</sup>

$$\text{Amount of } H_2 \text{ evolution} = \frac{\left[ \frac{0.00294 \text{ mV min}}{(22.487 - 0.00294) \text{ mV min}} \right] \times 1 \text{ ml} \times \text{mol}}{22.4 \times 1000 \text{ ml}}$$

(where 1 ml is the volume of the headspace.)

**Amount of H<sub>2</sub> evolution for 1 h = 5.837 nmol**

## **Reference**

1. K. Zhang, D. Jing, C. Xing and L. Guo, *Int. J. Hydrogen Energy*, 2007, **32**, 4685-4691.
